# Supplementary material for: The Effect of Perceptual Learning on Face Recognition in Individuals with Central Vision Loss
Source: PubMed Central journal article supplement (PMC7425703; doi:10.1167/iovs.61.8.2), 2020-07-01

Supplementary Figure SF2. Fundus images from the MAIA showing the PRL (both left images) and fixation areas (both right images) for the pre-training session (first and third images) and post-training session (second and fourth images) for each individual participant.

\* I (purple dot) = preferred retinal locus (PRL) for the first 10s of the microperimetry test.

\* F (cyan dot) = average PRL for the complete microperimetry test.

\* Small magenta circle = area of stable fixation for 63% of the microperimetry test.

\* Large magenta circle = area of stable fixation for 95% of the microperimetry test.

### Trained Participants

RT

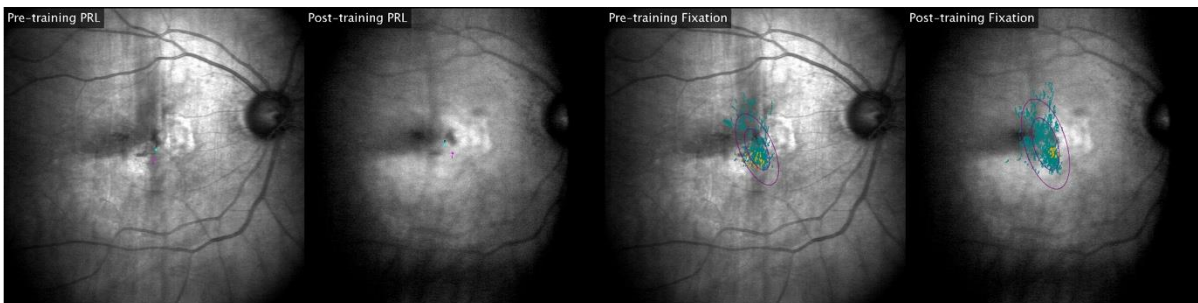

LJ

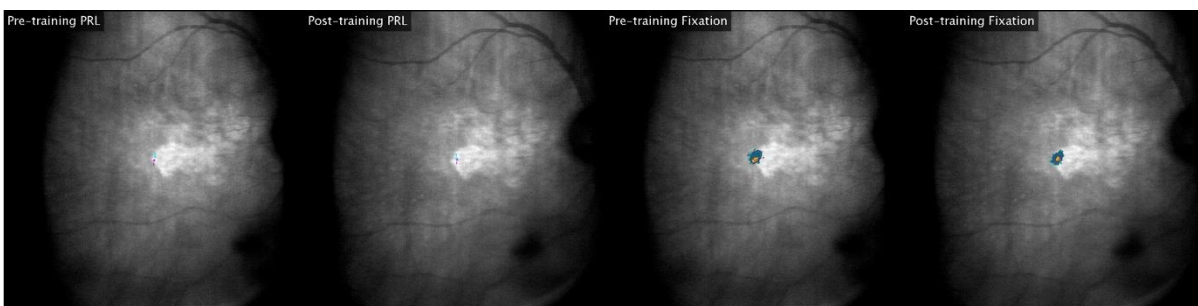

## MV

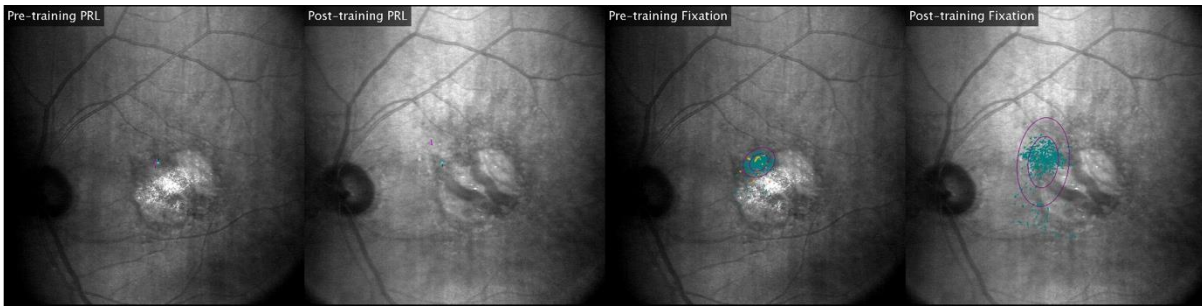

## WB

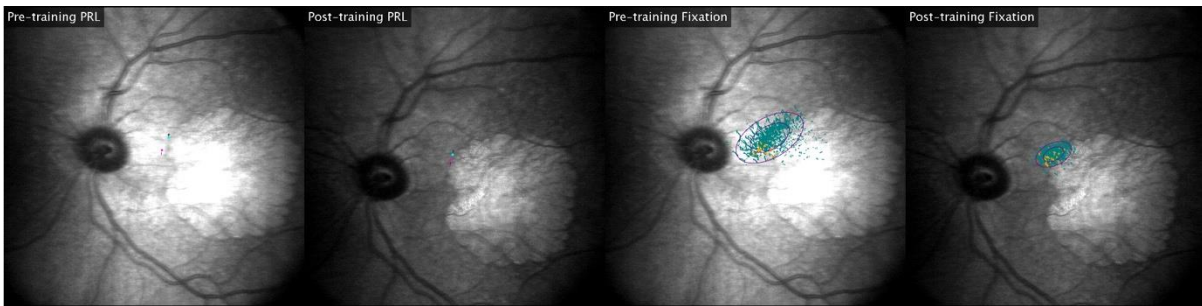

## SC

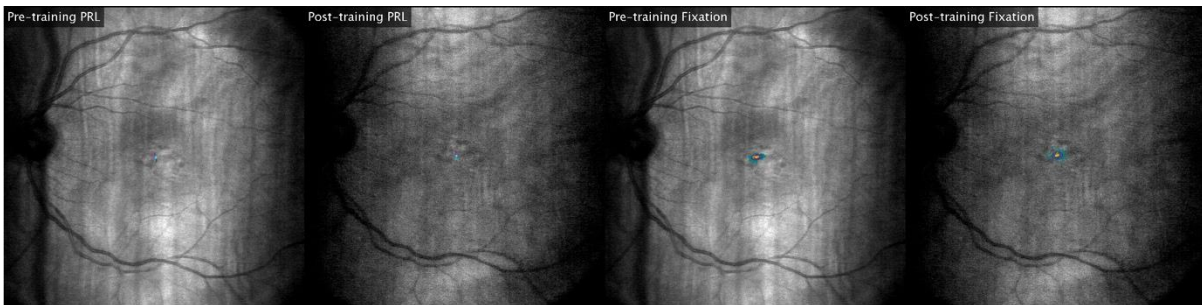

## AS1

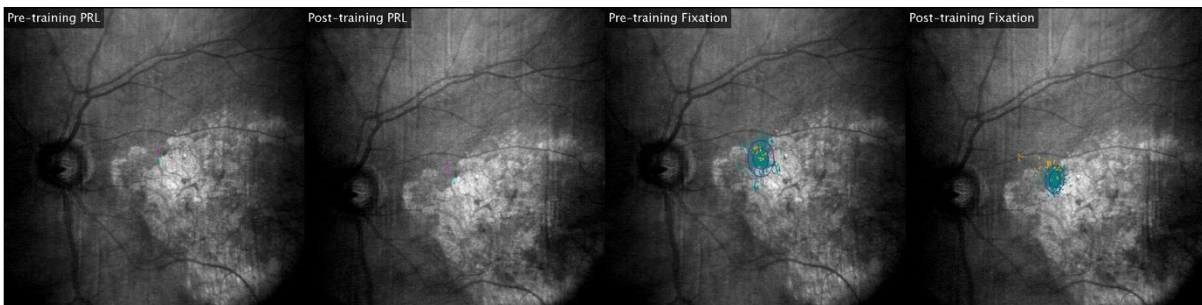

**JH**

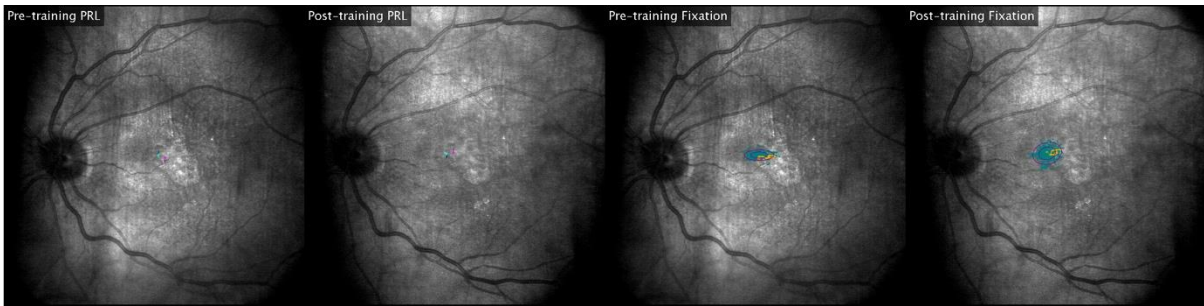

**MS**

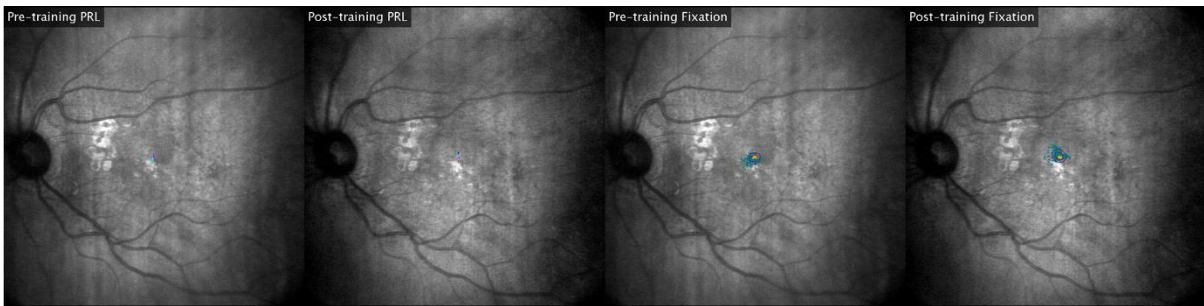

**JG**

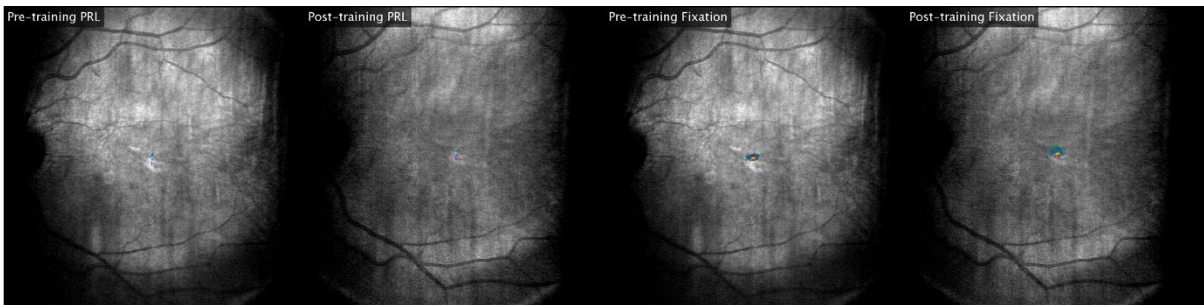

**DB**

\* Optic disc unable to be imaged. Fixation stability not included in analysis.

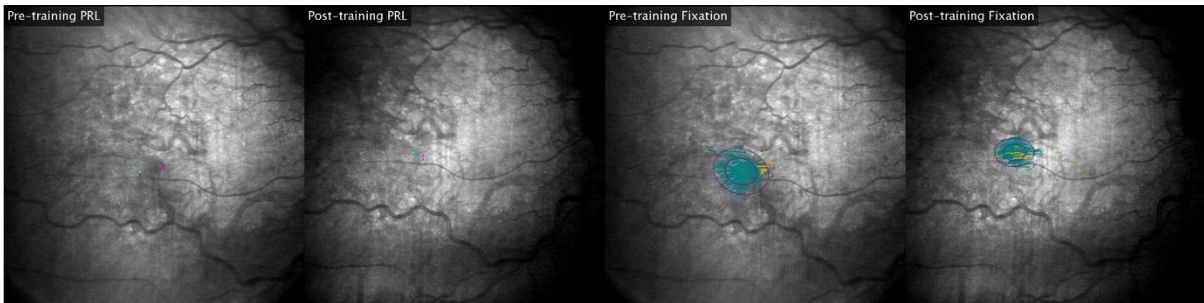



# Control Participants

## DS

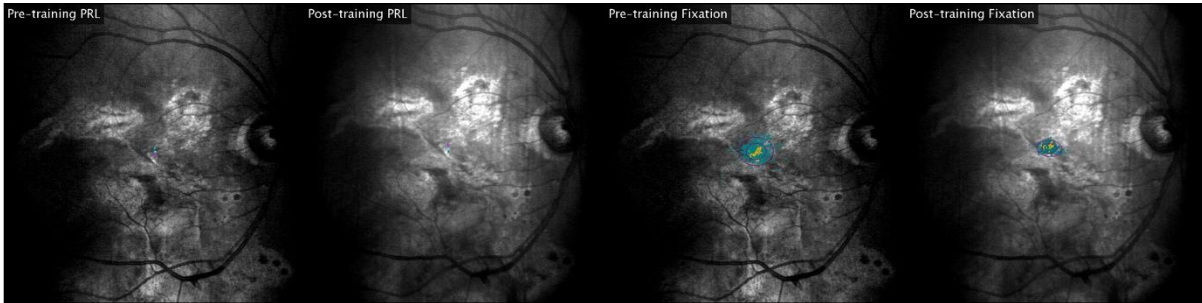

## SA

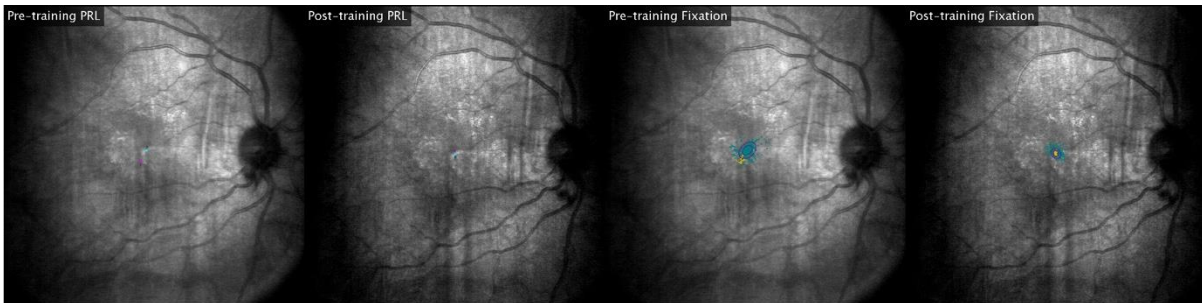

## AS

\* Optic disc unable to be imaged. Fixation stability not included in analysis.

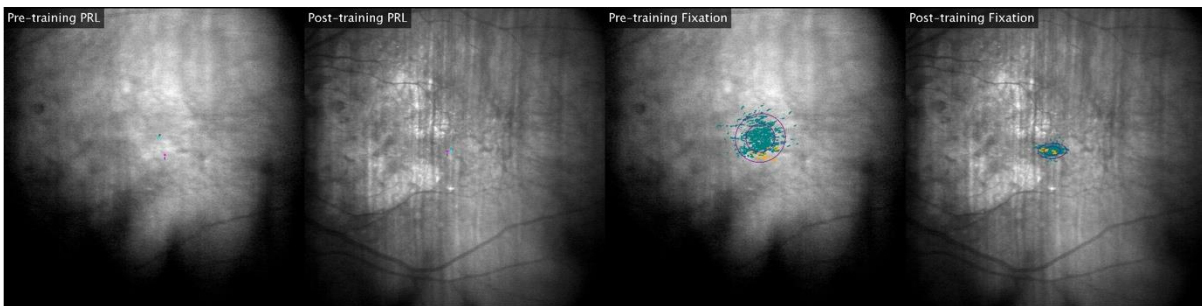

## SS

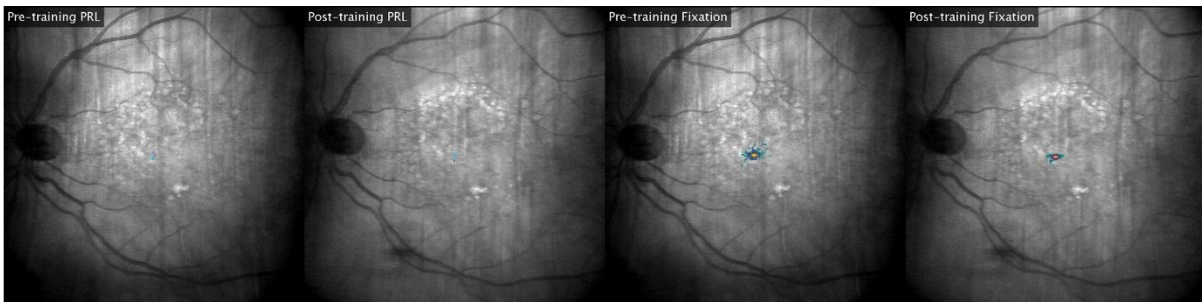

**SK**

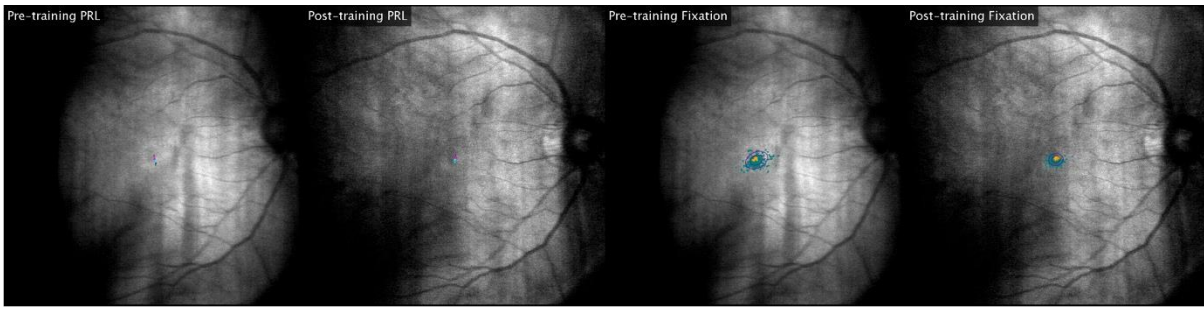

**SG**

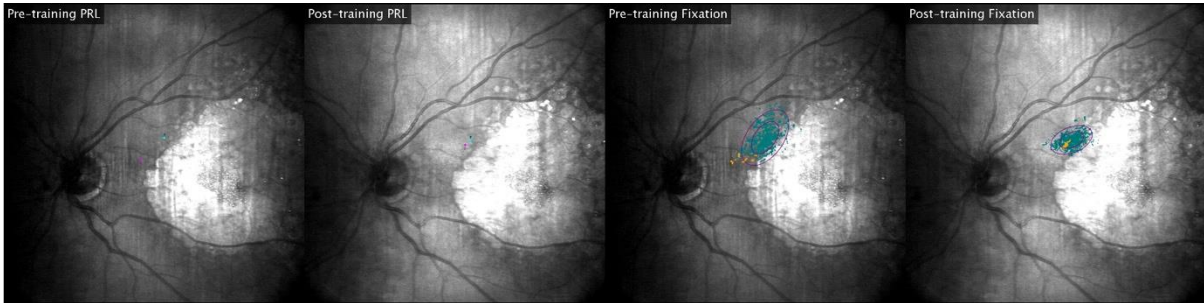

**GB**

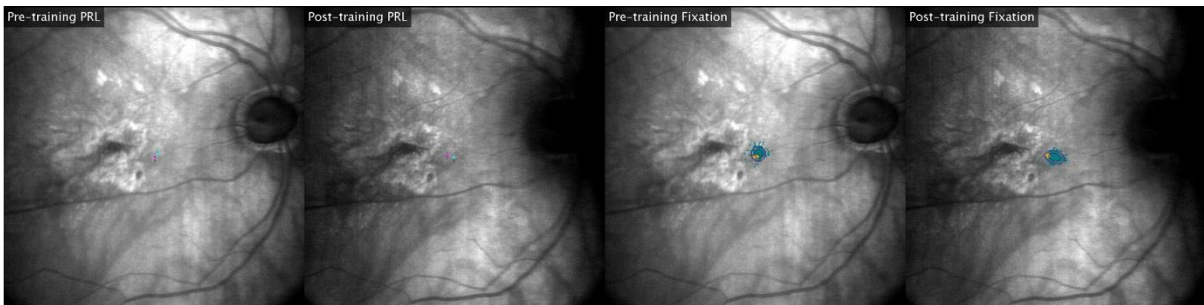

**RH**

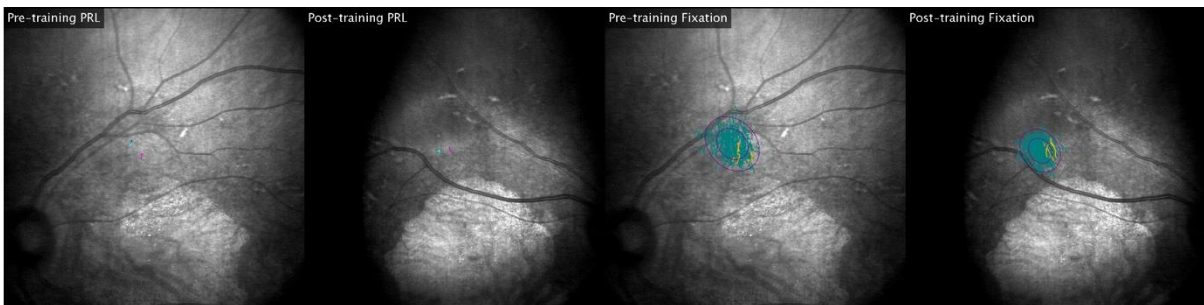

## NT

\* Optic disc unable to be imaged. Fixation stability not included in analysis.

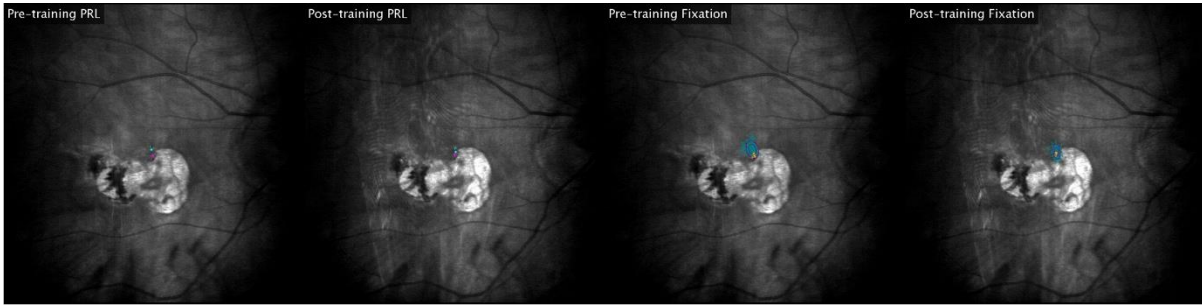

Supplement: iovs-61-8-2_s003.pdf [file iovs-61-8-2_s003.pdf]
