# Supplementary material for: The Effect of Perceptual Learning on Face Recognition in Individuals with Central Vision Loss
Source: PubMed Central journal article supplement (PMC7425703; doi:10.1167/iovs.61.8.2), 2020-07-01
Supplement: iovs-61-8-2_s001.pdf [file iovs-61-8-2_s001.pdf]

Supplementary Table ST1. Correlations between vision variables and pre-training performance and improvement in performance on the face tasks.†

| Measurement                                  | 1     | 2     | 3      | 4      | 5      | 6     | 7     | 8    |
|----------------------------------------------|-------|-------|--------|--------|--------|-------|-------|------|
| Age                                          | 1.00  | -     | -      | -      | -      | -     | -     | -    |
| Fixation Stability (BCEA 63%)                | -0.42 | 1.00  | -      | -      | -      | -     | -     | -    |
| Visual Acuity (logMAR)                       | -0.29 | 0.25  | 1.00   | -      | -      | -     | -     | -    |
| Preferred Retinal Locus                      | -0.11 | 0.50* | 0.56** | 1.00   | -      | -     | -     | -    |
| Pre-training face recognition performance    | 0.07  | 0.37  | 0.50*  | 0.63** | 1.00   | -     | -     | -    |
| Change in face recognition performance       | -0.03 | 0.17  | -0.17  | 0.20   | 0.49*  | 1.00  | -     | -    |
| Pre-training face discrimination performance | 0.31  | 0.04  | 0.58** | 0.62** | 0.69** | 0.10  | 1.00  | -    |
| Change in face discrimination performance    | 0.02  | -0.10 | -0.14  | 0.00   | -0.33  | -0.41 | -0.32 | 1.00 |

† Pearson correlations were performed.  
 BCEA 63% (Bivariate Contour Ellipse Area, 63%).  
 logMAR (Logarithm of the Minimum Angle of Resolution).  
 \*\* p<0.01; \* p<0.05.
