# Supplementary material for: The Effect of Perceptual Learning on Face Recognition in Individuals with Central Vision Loss
Source: PubMed Central journal article supplement (PMC7425703; doi:10.1167/iovs.61.8.2), 2020-07-01

Supplementary Figure SF1. Individual face discrimination training curves.

**Trained Participants**

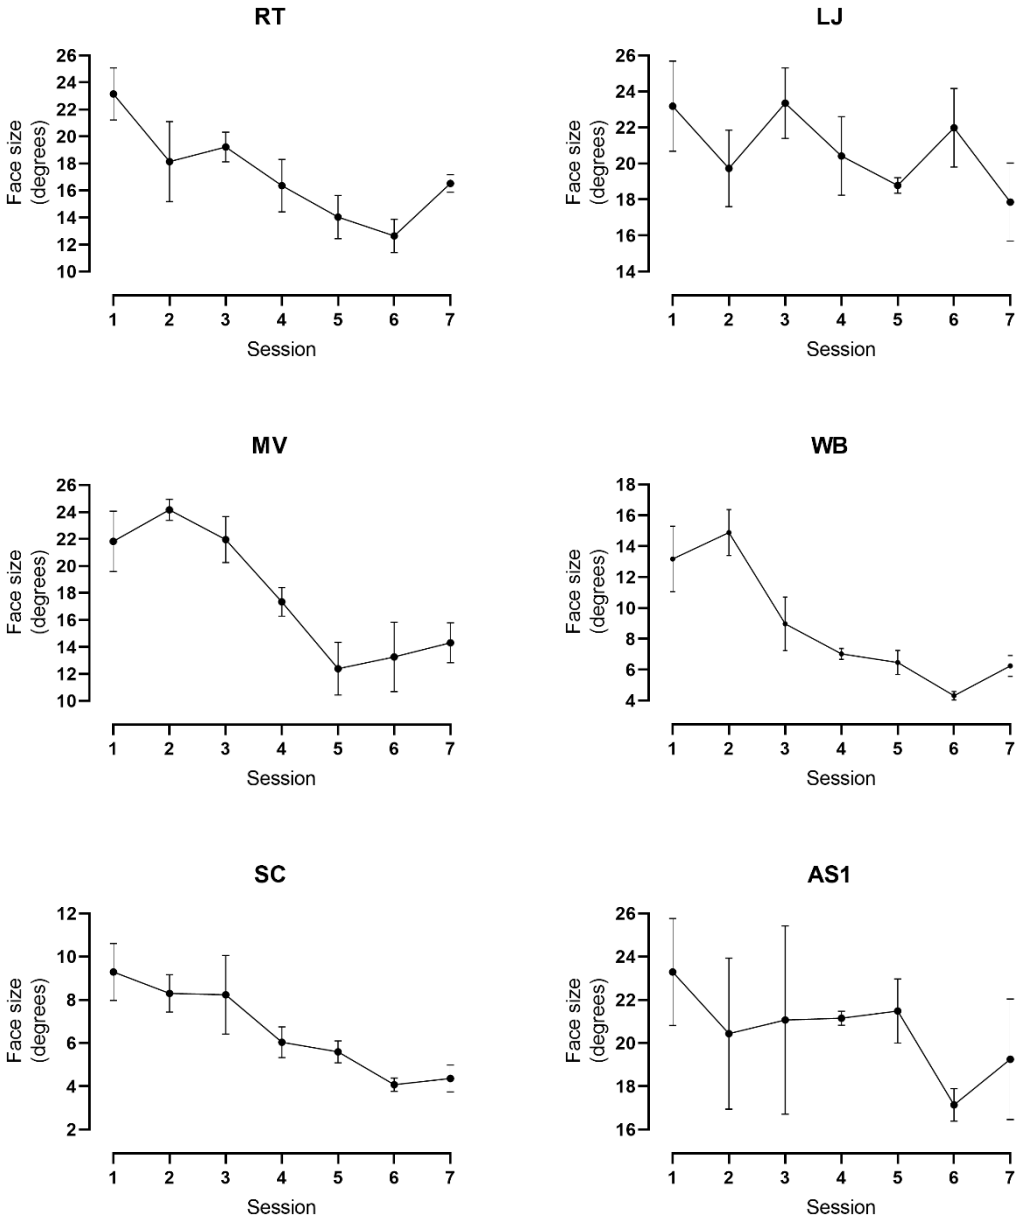

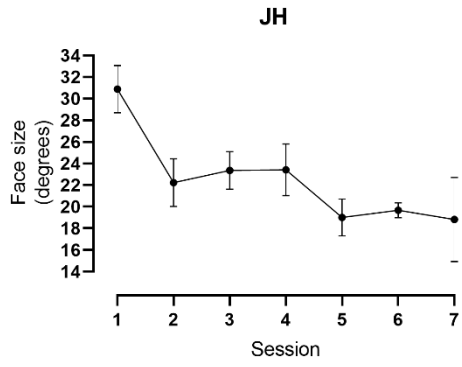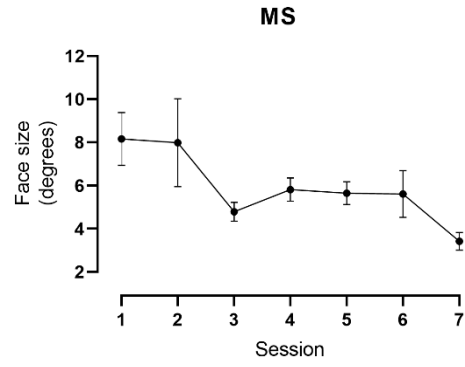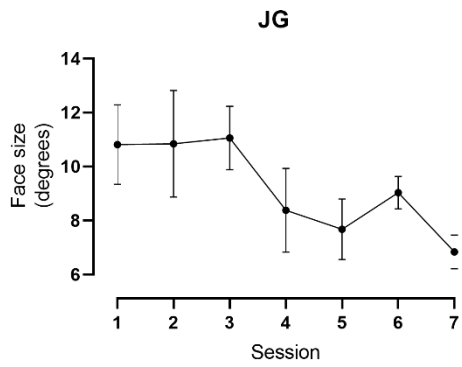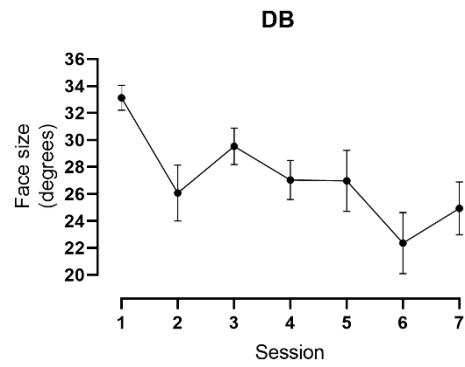

## Control Participants

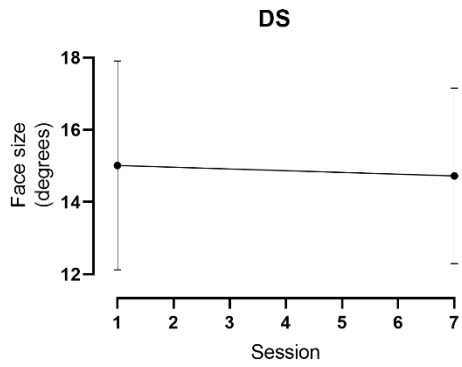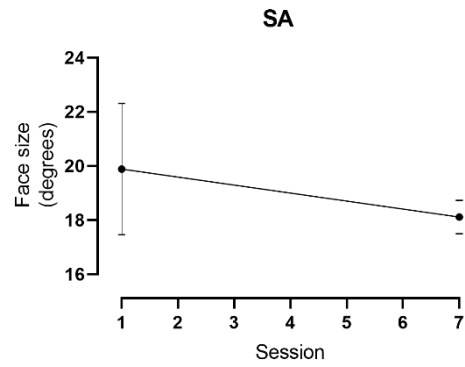

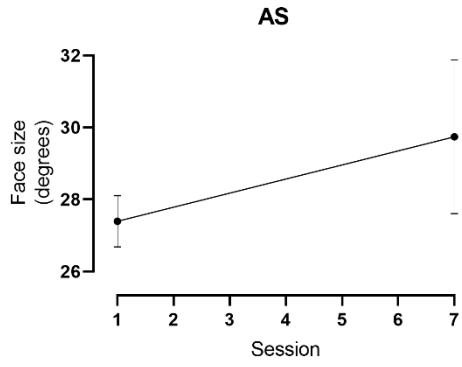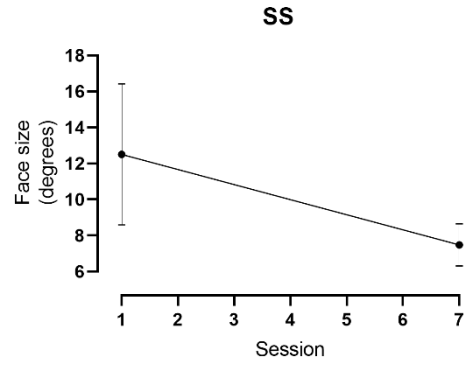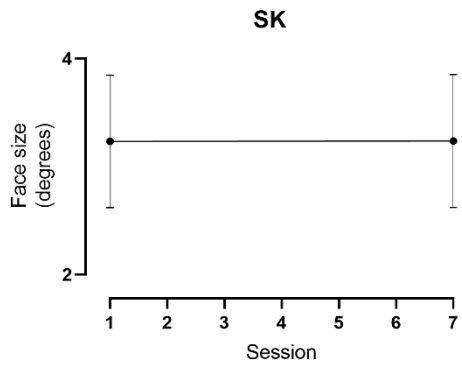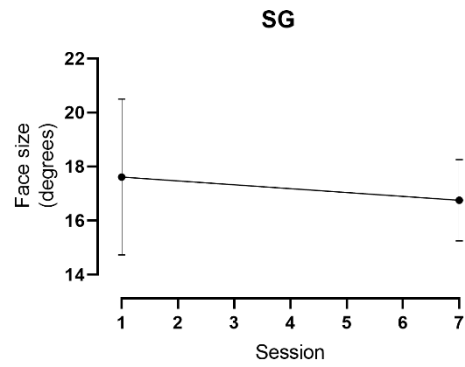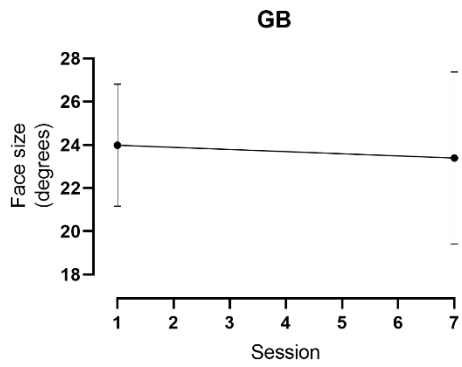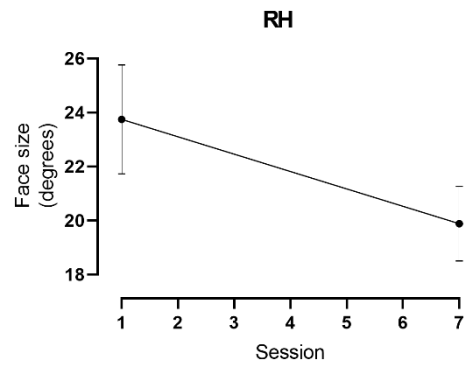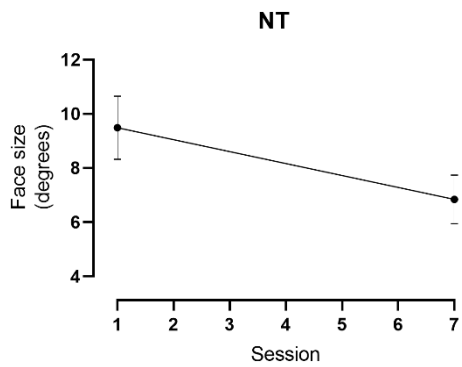

Supplement: iovs-61-8-2_s002.pdf [file iovs-61-8-2_s002.pdf]
